# Supplementary material for: Populus tremula (European aspen) shows no evidence of sexual dimorphism
Source: PubMed Central journal article supplement (PMC4203875; doi:10.1186/s12870-014-0276-5), 2014-10-16

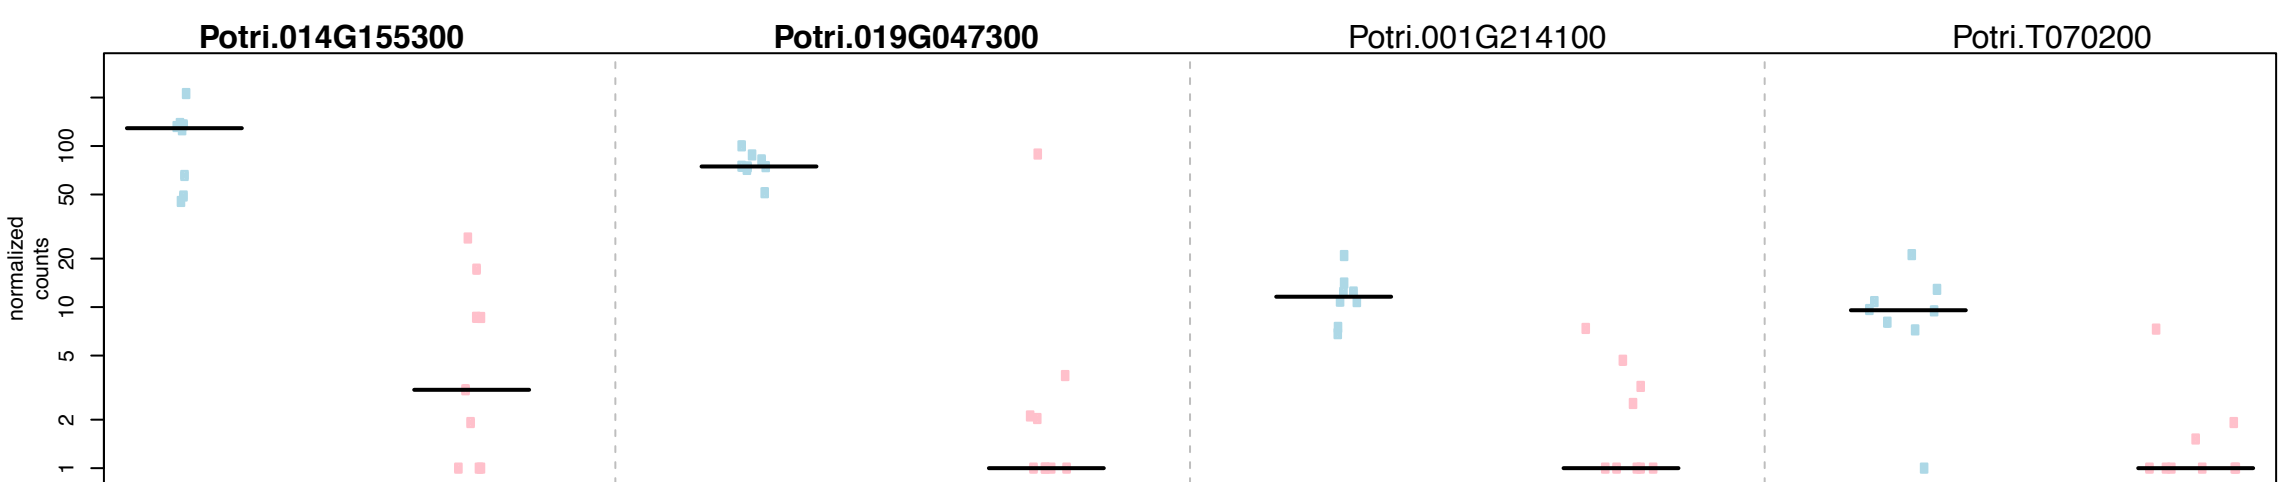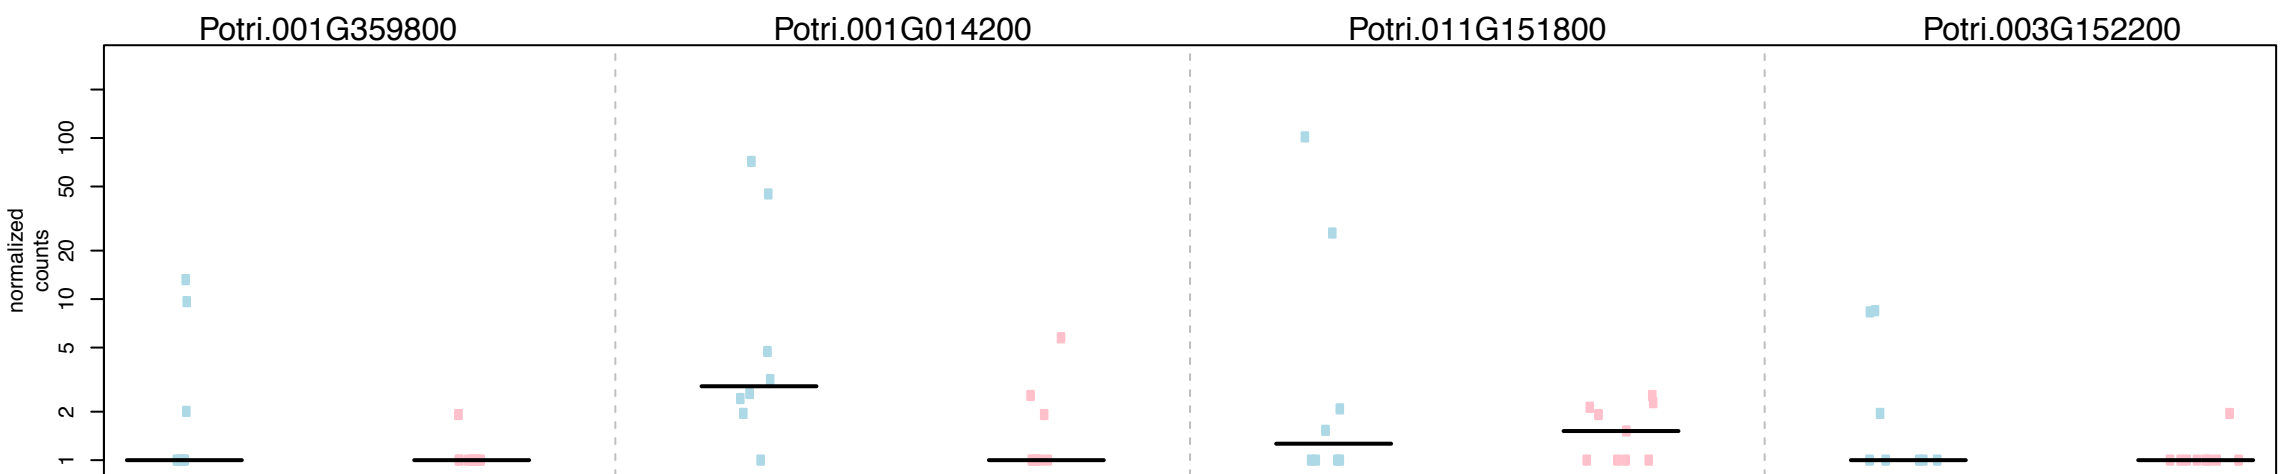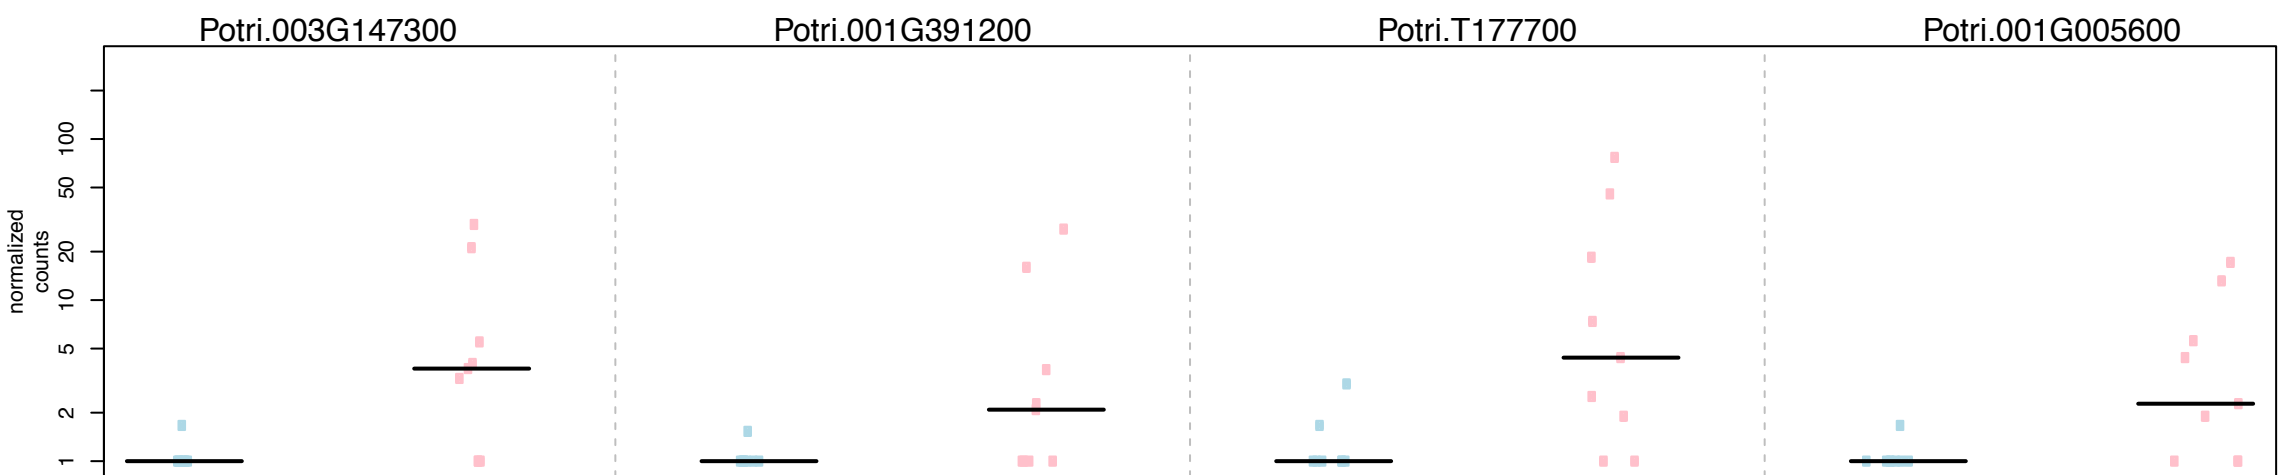

Supplement: 12870_2014_276_MOESM2_ESM.pdf [file 12870_2014_276_MOESM2_ESM.pdf]
